# Supplementary material
Source: PubMed Central journal article supplement (PMC3929435)
Supplement: mabs-6-108-s01.pdf [file mabs-6-108-s01.pdf]

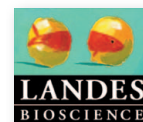

**Supplemental Material to:**

**Scott N. Furlan, Rajakumar Mandraju, Travis  
Brewer, Kole Roybal, Ty Dale Troutman, Wei Hu,  
Noah W. Palm, Arun Unni,  
and Chandrashekhar Pasare**

**Enhancement of anti-tumor CD8 immunity by IgG1-  
mediated targeting of Fc receptors**

**2014; mAbs 6(1)**

**<http://dx.doi.org/10.4161/mabs.27502>**

**<https://www.landesbioscience.com/journals/mabs/article/27502/>**

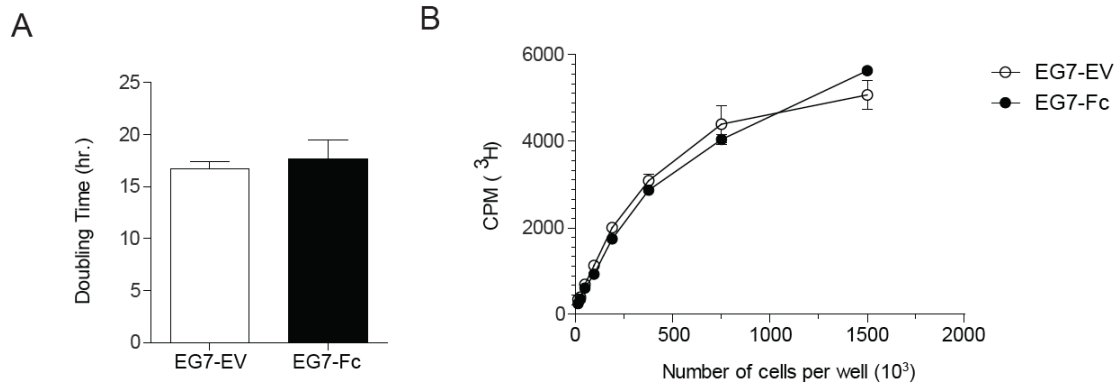

**Figure S1. Doubling time is not different between modified tumors.** A. Tumors were plated at  $10^5/\text{mL}$  and counted on day 3. No significant difference was seen in cell turnover rate (replicates of 3 each group). B. No significant difference was seen in the incorporation of  $^3\text{H}$  thymidine into cell cultures over a 18-hour period.

A

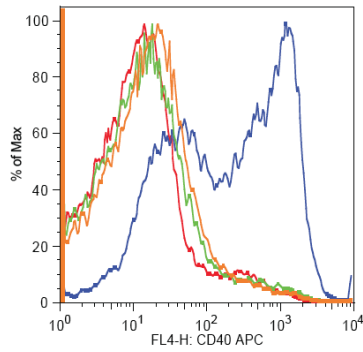

B

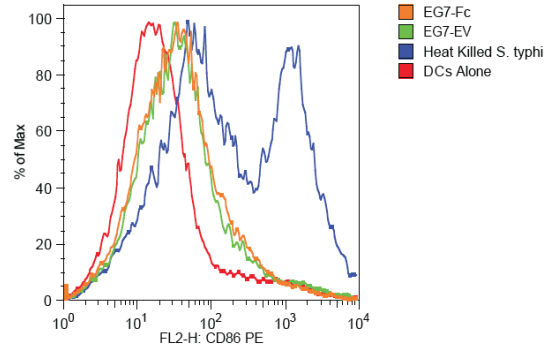

**Figure S2. Culture of DCs with IgG1 Fc expressing tumor does not result in upregulation of activation markers on DCs.** Tumors were cultured with BMDCs overnight and DCs were stained to measure upregulation of CD86 (A) or CD40 (B). Heat killed (HK) *Salmonella typhimurium* was used as positive control for DC maturation.

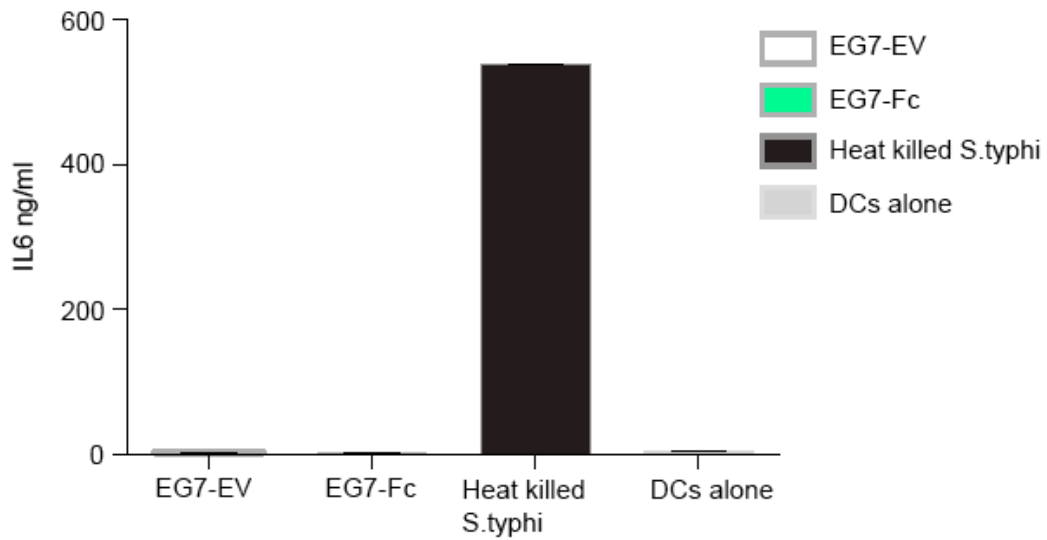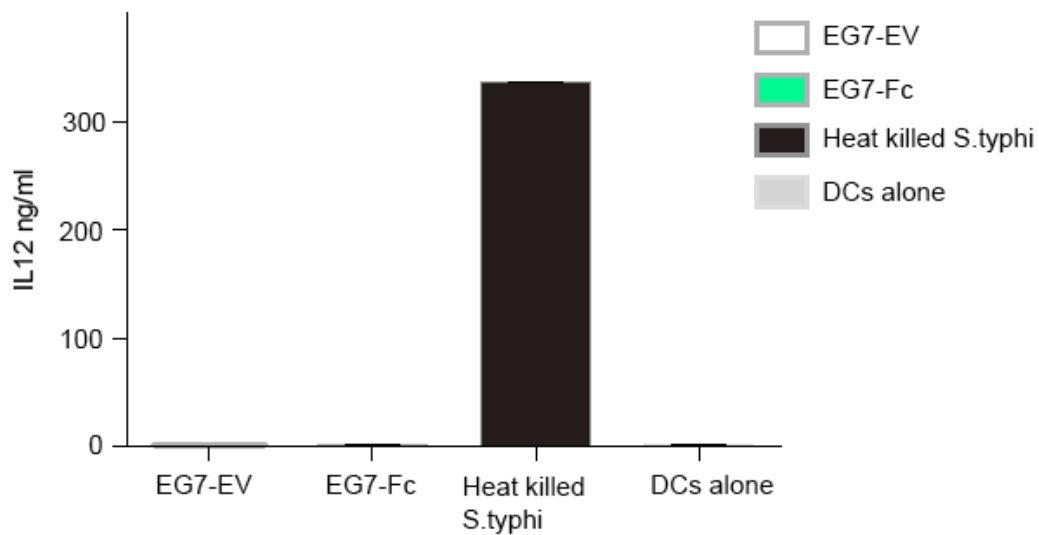

**Figure S3. DCs cultured with IgG1 Fc expressing tumor cells do not secrete pro-inflammatory cytokines.** Supernatants from BMDCs cultured as described in Figure S2 were assayed for the presence of IL-6 and IL-12 by quantitative ELISA.
